# Supplementary material for: Inhibition of endoplasmic reticulum stress alleviates cigarette smoke-induced airway inflammation and emphysema
Source: PubMed Central journal article supplement (PMC5652808; doi:10.18632/oncotarget.20768), 2017-09-08
Supplement: oncotarget-08-77685-s001.pdf [file oncotarget-08-77685-s001.pdf]

# Inhibition of endoplasmic reticulum stress alleviates cigarette smoke-induced airway inflammation and emphysema

## SUPPLEMENTARY MATERIALS

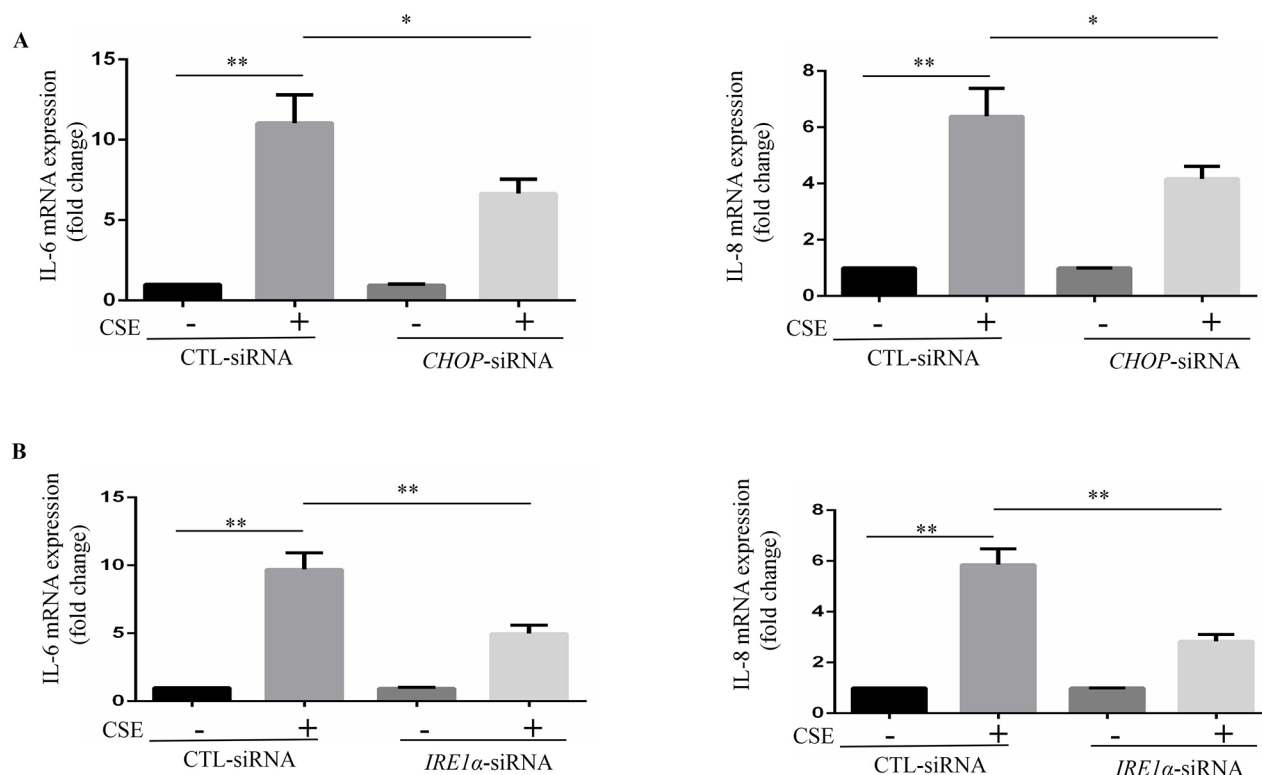

**Supplementary Figure 1: Effects of CHOP or IRE1 $\alpha$  knockdown on CS-induced IL6 and 8 production in cultured Beas-2B cells.** Beas-2B cells were transfected with Control-siRNA, CHOP-siRNA or IRE1 $\alpha$ -siRNA for 24 h then stimulated with 2% CSE for 12h. (A and B) The mRNA expression of IL-6 or IL-8 were analyzed by quantitative PCR.
